# Supplementary material for: Epigenetic and transcriptional regulations prime cell fate before division during human pluripotent stem cell differentiation
Source: PubMed Central journal article supplement (PMC9876972; doi:10.1038/s41467-023-36116-9), 2023-01-25
Supplement: 41467_2023_36116_MOESM1_ESM.pdf [file 41467_2023_36116_MOESM1_ESM.pdf]

## Supplementary Information

### **Epigenetic and transcriptional regulations prime cell fate before division during human pluripotent stem cell differentiation**

Pedro Madrigal, Siwei Deng, Yuliang Feng, Stefania Militi, Kim Jee Goh, Reshma Nibhani,

Rodrigo Grandy, Anna Osnato, Daniel Ortmann, Stephanie Brown, Siim Pauklin

#### **Supplementary Table 1. Antibodies.**

All primary antibodies were used at 1:1000 dilution for western blotting, at 1:100 dilution for Immunofluorescence microscopy and flow cytometry, and 10µg per sample for ChIP unless otherwise specified. Secondary antibodies were used at 1:10,000 dilution for western blotting, and at 1:1000 for Immunofluorescence microscopy and flow cytometry unless otherwise specified.

| Antibody raised against     | Catalog number             | Company   | Clone/Lot |
|-----------------------------|----------------------------|-----------|-----------|
| Histone H3                  | ab1791                     | Abcam     | Poly      |
| Histone H3 (tri methyl K4)  | ab8580                     | Abcam     | Poly      |
| Histone H3 (tri methyl K27) | C15200181<br>(MAb-181-050) | Diagenode | 001-13    |
| Histone H3 (mono methyl K4) | ab8895                     | Abcam     | Poly      |
| Histone H3 (acetyl K27)     | ab4729                     | Abcam     | Poly      |

|                             |              |                              |          |
|-----------------------------|--------------|------------------------------|----------|
| Histone H3 (tri methyl K36) | ab9050       | Abcam                        | Poly     |
| Actin, clone C4             | MAB1501      | Chemicon                     | AC-74    |
| Brachyury (T)               | af2085       | R&D Systems                  | Poly     |
| EOMES                       | ab23345      | Abcam                        | Poly     |
| Nanog                       | af1997       | R&D Systems                  | Poly     |
| Nestin (Rat-401)            | sc-33677     | Santa Cruz                   | RAT-401  |
| Oct-3/4 (C-10)              | sc-5279      | Santa Cruz                   | C-10     |
| Pax6                        | PRB-278P-100 | Covance                      | Poly     |
| Sox1                        | AF3369       | R&D Systems                  | Poly     |
| Sox17                       | AF1924       | R&D Systems                  | Poly     |
| Sox2                        | AF2018       | R&D Systems                  | Poly     |
| CXCR4                       | MAB173       | R&D Systems                  | 44717    |
| Tra-1-60                    | sc-21705     | Santa Cruz                   |          |
| FRA2 (D2F1E)                | 19967S       | Cell Signaling<br>Technology | D2F1E    |
| JUN                         | 22114-1-AP   | Proteintech                  | Poly     |
| c-JUN (60A8)                | 9165T        | Cell Signaling<br>Technology | 60A8     |
| SMAD2/3                     | AF3797       | Bio-Techne                   | Poly     |
| GATA4                       | 104604-T36   | Sino Biological              | Poly     |
| PDX1                        | AF2419       | Bio-Techne                   | Poly     |
| SOX9                        | ab185230     | AbCam                        | EPR14335 |
| APC anti-human CD142 [NY2]  | 365205       | Biolegend                    | NY2      |

|                                            |        |            |      |
|--------------------------------------------|--------|------------|------|
| Alexa Fluor 647 goat $\alpha$ -mouse IgM   | A21238 | Invitrogen | Poly |
| Alexa Fluor 647 donkey $\alpha$ -mouse IgG | A31571 | Invitrogen | Poly |
| Alexa Fluor 647 donkey $\alpha$ -goat      | A21447 | Invitrogen | Poly |

**Supplementary Table 2. QPCR Primers.**

| <b>Gene</b>          | <b>Forward sequence (5' to 3')</b> | <b>Reverse sequence (5' to 3')</b> |
|----------------------|------------------------------------|------------------------------------|
| <i>ACTB</i>          | CTGGAACGGTGAAGGTGACA               | AAGGGACTTCCTGTAACAATGCA            |
| <i>BRACHYURY (T)</i> | TGCTTCCTGAGACCCAGTT                | GATCACTTCTTTCTTTGCATCAAG           |
| <i>CDX2</i>          | GGCAGCCAAGTGAAAACCAG               | TTCCTCTCCTTTGCTCTGCG               |
| <i>EOMES</i>         | ATCATTACGAAACAGGGCAGGC             | CGGGGTTGGTATTTGTGTAAGG             |
| <i>FOXA2</i>         | GGGAGCGGTGAAGATGGA                 | TCATGTTGCTCACGGAGGAGTA             |
| <i>GATA4</i>         | TCCCTCTTCCCTCTCAAAT                | TCAGCGTGTAAGGCATCTG                |
| <i>HAND1</i>         | GTGCGTCCTTTAATCCTCTTC              | GTGAGAGCAAGCGGAAAAG                |
| <i>MIXL1</i>         | GGTACCCCGACATCCACTTG               | TAATCTCCGGCCTAGCCAAA               |
| <i>NANOG</i>         | CATGAGTGTGGATCCAGCTTG              | CCTGAATAAGCAGATCCATGG              |
| <i>NKX2.5</i>        | GAGCCGAAAAGAAAGCCTGAA              | CACCGACACGTCTCACTCAG               |
| <i>POU5F1</i>        | AGTGAGAGGCAACCTGGAGA               | ACACTCGGACCACATCCTTC               |
| <i>SOX17</i>         | CGCACGGAATTTGAACAGTA               | GGATCAGGGACCTGTACAC                |
| <i>SOX2</i>          | TGGACAGTTACGCGCACAT                | CGAGTAGGACATGCTGTAGGT              |

**Supplementary Table 3. CHIP Primers.**

| <b>Primer name</b>    | <b>Experimental usage</b> | <b>Sequence</b>      |
|-----------------------|---------------------------|----------------------|
| MESP2:90326940 CHIP F | Additional binding sites  | AGGGACAGAGCACCATCATC |

|                        |                            |                       |
|------------------------|----------------------------|-----------------------|
| MESP2:90326940 CHIP R  | Additional binding sites   | ACTTAGCAAATGGCCTGACG  |
| MESP2:90319794 CHIP F  | Additional binding sites   | CCTCCTCTCCGATTCGT     |
| MESP2:90319794 CHIP R  | Additional binding sites   | CAAGGAGGGAGGCAGAAAG   |
| MESP2:90303697 CHIP F  | Smad2/3 / FOSL2 / JUN ChIP | CCCTCACACCTTCAGCTCTC  |
| MESP2:90303697 CHIP R  | Smad2/3 / FOSL2 / JUN ChIP | TTCCTGGAATCTGCCAAGTC  |
| MESP1:90294197 CHIP F  | Additional binding sites   | CTCGATCTTGGTCAGGCTCT  |
| MESP1:90294197 CHIP R  | Additional binding sites   | CCAGTGAGCGGGAGAAACT   |
| MESP1:90291241 CHIP F  | Smad2/3 / FOSL2 / JUN ChIP | GTCCCCTGCCTATCTCCAGT  |
| MESP1:90291241 CHIP R  | Smad2/3 / FOSL2 / JUN ChIP | CATTGGCTAGCCCCCTTC    |
| CER1:14722865 CHIP F   | Smad2/3 / FOSL2 / JUN ChIP | GAAGGCAGGTGGTCAGTAGC  |
| CER1:14722865 CHIP R   | Smad2/3 / FOSL2 / JUN ChIP | TGCTCTTTAAGCCCCAGACA  |
| CER1:14723566 CHIP F   | Additional binding sites   | CATGTTCTCAACAGGATACCA |
| CER1:14723566 CHIP R   | Additional binding sites   | CCAGCGTCACACACAAAGTT  |
| EOMES:27755748 CHIP F  | Smad2/3 / FOSL2 / JUN ChIP | TGGCGGAGAATGTAAACAAA  |
| EOMES:27755748 CHIP R  | Smad2/3 / FOSL2 / JUN ChIP | TGGCCCCAATTAACACCTTA  |
| FOXA2:22559856 CHIP F  | Smad2/3 / FOSL2 / JUN ChIP | TCCCCGACATCCTTTTTATG  |
| FOXA2:22559856 CHIP R  | Smad2/3 / FOSL2 / JUN ChIP | GGGACAATGGAGGCTGAAAG  |
| CDX2:28536122 CHIP F   | Additional binding sites   | CAGGAGAGCCACGCATTC    |
| CDX2:28536122 CHIP R   | Additional binding sites   | TTGCAAGCTGATTTGGAAAA  |
| CDX2:28528528 CHIP F   | Additional binding sites   | TTTGAAAAGCTTGGCGTCTT  |
| CDX2:28528528 CHIP R   | Additional binding sites   | CGGGATTCCCTGGAGAGAT   |
| MIXL1:226411093 CHIP F | Additional binding sites   | GATTTGACCCGGAGAAGAGA  |
| MIXL1:226411093 CHIP R | Additional binding sites   | AGGAGGGAGGCGTGAAGTT   |



|                        |                            |                       |
|------------------------|----------------------------|-----------------------|
| MIXL1:226398572 CHIP F | Smad2/3 / FOSL2 / JUN ChIP | AGCTGACCACTTCCTCTTGC  |
| MIXL1:226398572 CHIP R | Smad2/3 / FOSL2 / JUN ChIP | CAGTTTTGCCAGCATTGAAA  |
| GATA4:11567708 CHIP F  | Smad2/3 / FOSL2 / JUN ChIP | TGAAGCGCTTTTAAATTGTCC |
| GATA4:11567708 CHIP R  | Smad2/3 / FOSL2 / JUN ChIP | GTCTGGCTCCCCAAGAG     |
| LZTS1:20092281 CHIP F  | Smad2/3 / FOSL2 / JUN ChIP | TAATCCCCCTCCTGCTAA    |
| LZTS1:20092281 CHIP R  | Smad2/3 / FOSL2 / JUN ChIP | CAGCCCTCCAGAATAATCA   |
| GSC:95241963 CHIP F    | Smad2/3 / FOSL2 / JUN ChIP | AGGAATGTGGATTGGACTGC  |
| GSC:95241963 CHIP R    | Smad2/3 / FOSL2 / JUN ChIP | GGCAAGACTGTGAGAGCAGA  |
| GSC:95229907 CHIP F    | Additional binding sites   | AAGGTGCATTCCTCAATTCC  |
| GSC:95229907 CHIP R    | Additional binding sites   | GATTCCTCCTCACCTGCAA   |

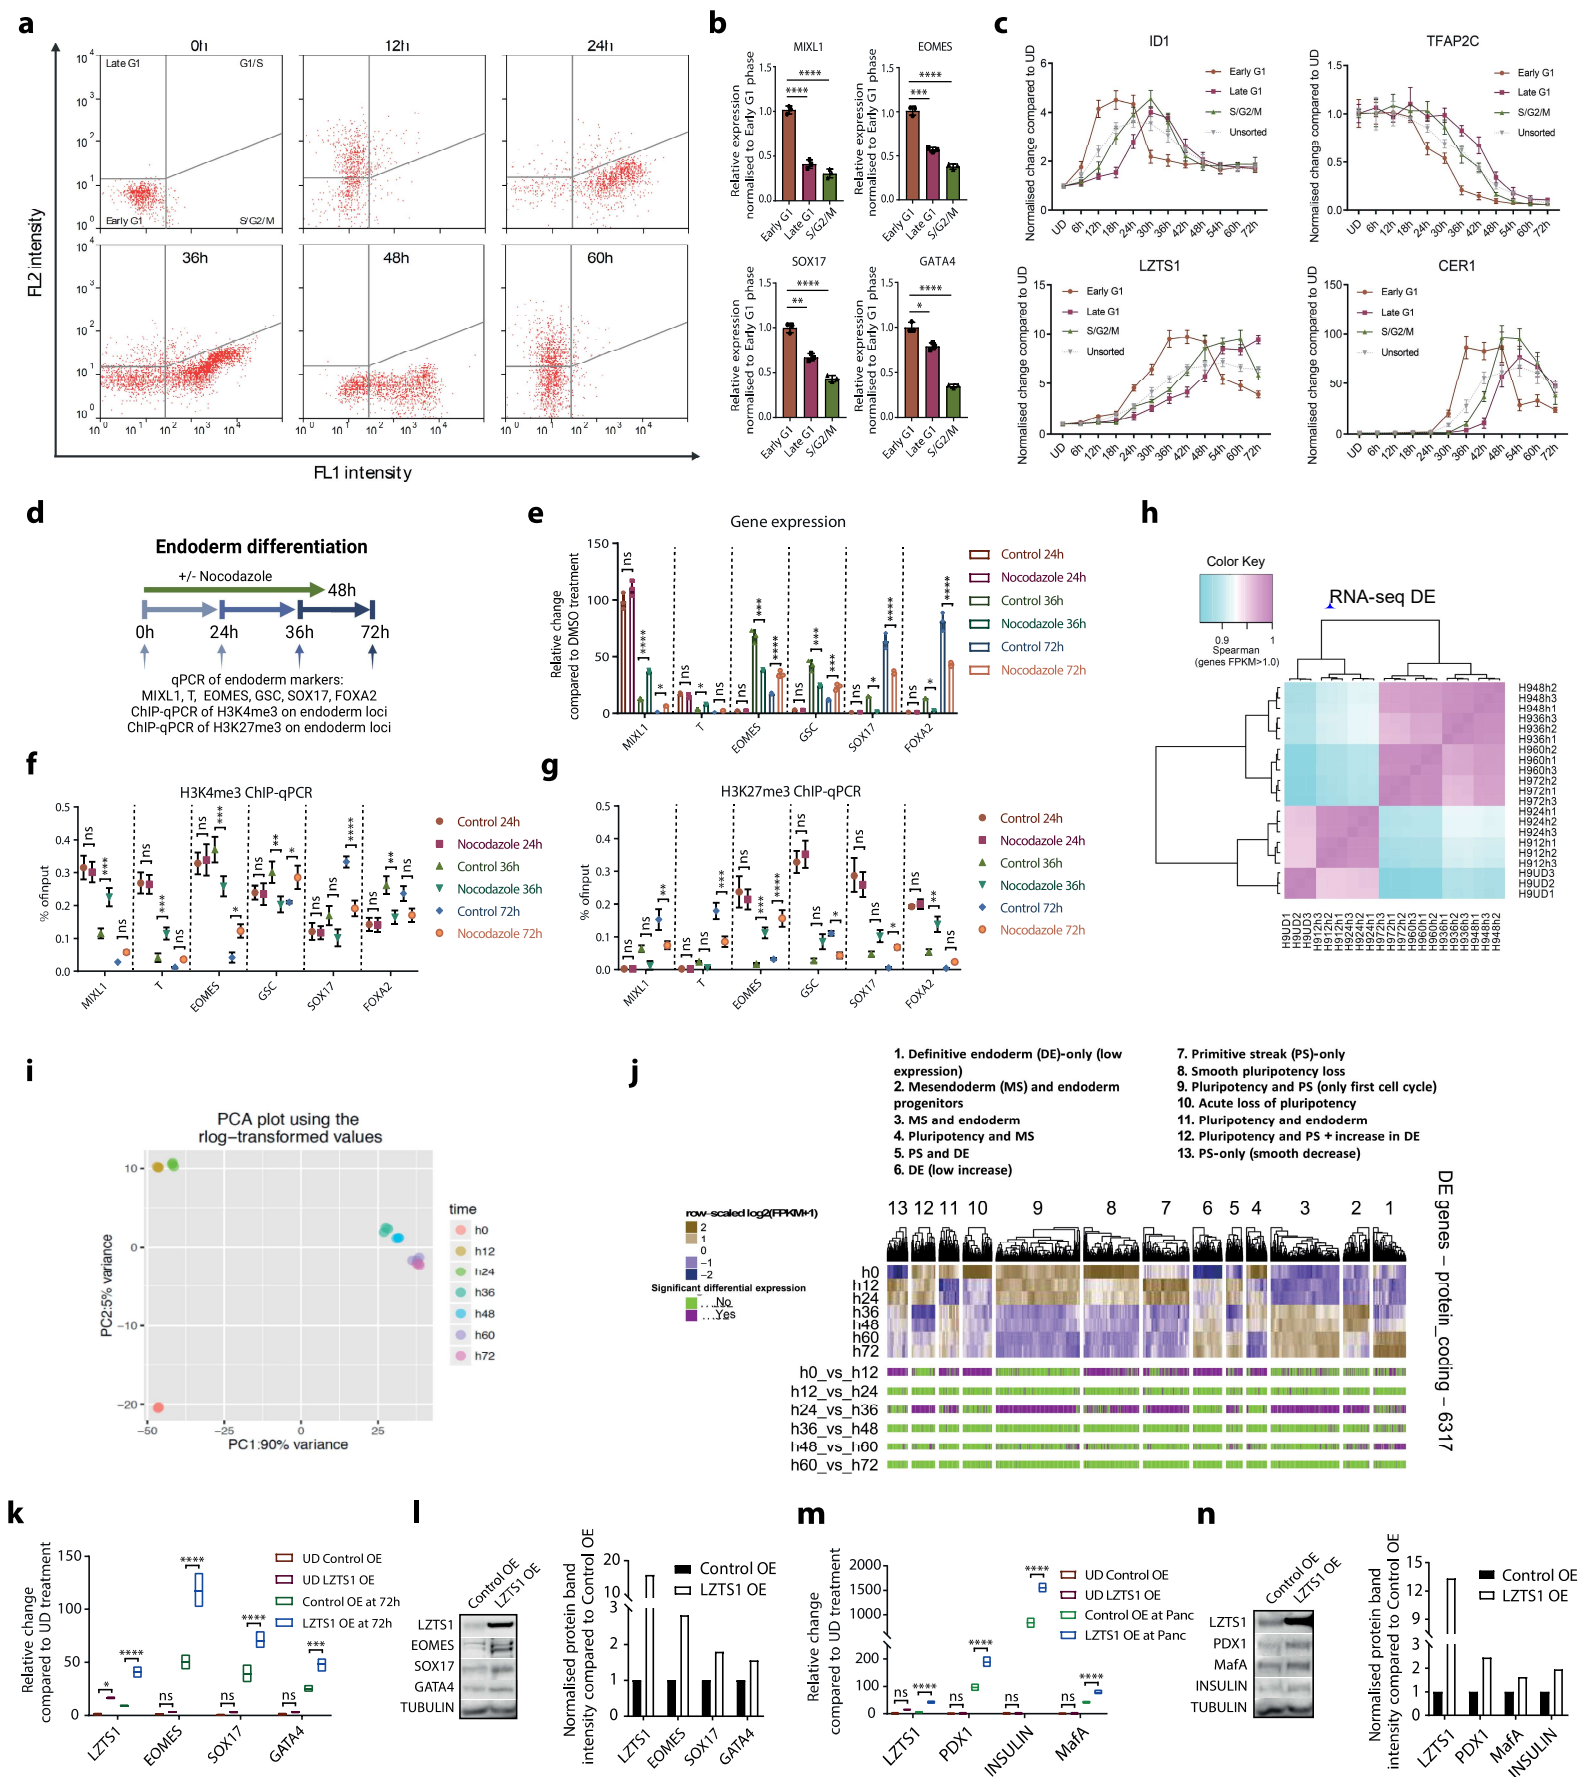

**Supplementary Figure 1: Differentiation of cell cycle synchronised hESCs reveals novel transiently expressed early mesendoderm genes.**

(a) FACS analyses showing cell cycle progression of EG1-FUCCI hPSCs differentiating into endoderm. (b) Expression of endoderm markers in different cell cycle phases of undifferentiated hESCs. Statistical analysis was performed by one-way ANOVA with Dunnett's multiple comparisons test. (c) H3K27ac ChIP-qPCR of ID1, TFAP2C, LZTS1, CER1 regulatory regions. FUCCI-hPSCs cells were sorted to early G1, late G1, S/G2/M or left unsorted, then differentiated to endoderm and collected for ChIP at different time points. Data in (b) and (c) depicts  $n = 3$  biologically independent experiments. (d) Schematic representation of Nocodazole treatment and sample collection upon endoderm differentiation. (e) Gene expression analysis during the blocking of cell divisions in endoderm differentiation. (f-g) H3K4me3 ChIP-qPCR and H3K27me3 ChIP-qPCR at endoderm markers upon Nocodazole treatment. Data in (e) to (g) depicts  $n = 3$  biologically independent experiments. (h) Hierarchical clustering analysis of Spearman correlation coefficients for gene expression in RNA-seq samples. (i) Principal component analysis (PCA) of G1 synchronised FUCCI-hPSCs differentiating into endoderm. (j) k-means clustering of differentially expressed genes (0 h, 12 h, 24 h, 36 h, 48 h, 60 h and 72 h) and annotated clusters ( $k=13$ ). Model based optimal number of clusters with 6,317 protein coding genes was computed. The number of clusters  $k$  was selected as the one that minimised the Bayesian Information Criterion. (k-l) The effect of LZTS1 overexpression on endoderm marker expression analysed by (k) qPCR and (l) western blot. (m-n) The effect of LZTS1 overexpression on pancreatic beta cell marker expression analysed by (m) qPCR and (n) western blot. The bounds of box plots in (k) and (m) represent minima, maxima, and the horizontal line represents the mean of experiments. Statistical analysis in (e, f, g, k, m) was performed by two-way ANOVA with Tukey's multiple comparisons tests and \* marks adjusted P-value  $<0.05$  and \*\* marks adjusted P-value  $<0.01$ , \*\*\* marks adjusted P-value  $<0.001$ , \*\*\*\* marks adjusted P-value  $<0.0001$ . Data are presented as mean values  $\pm$  SD. Source data are provided as a Source Data file.

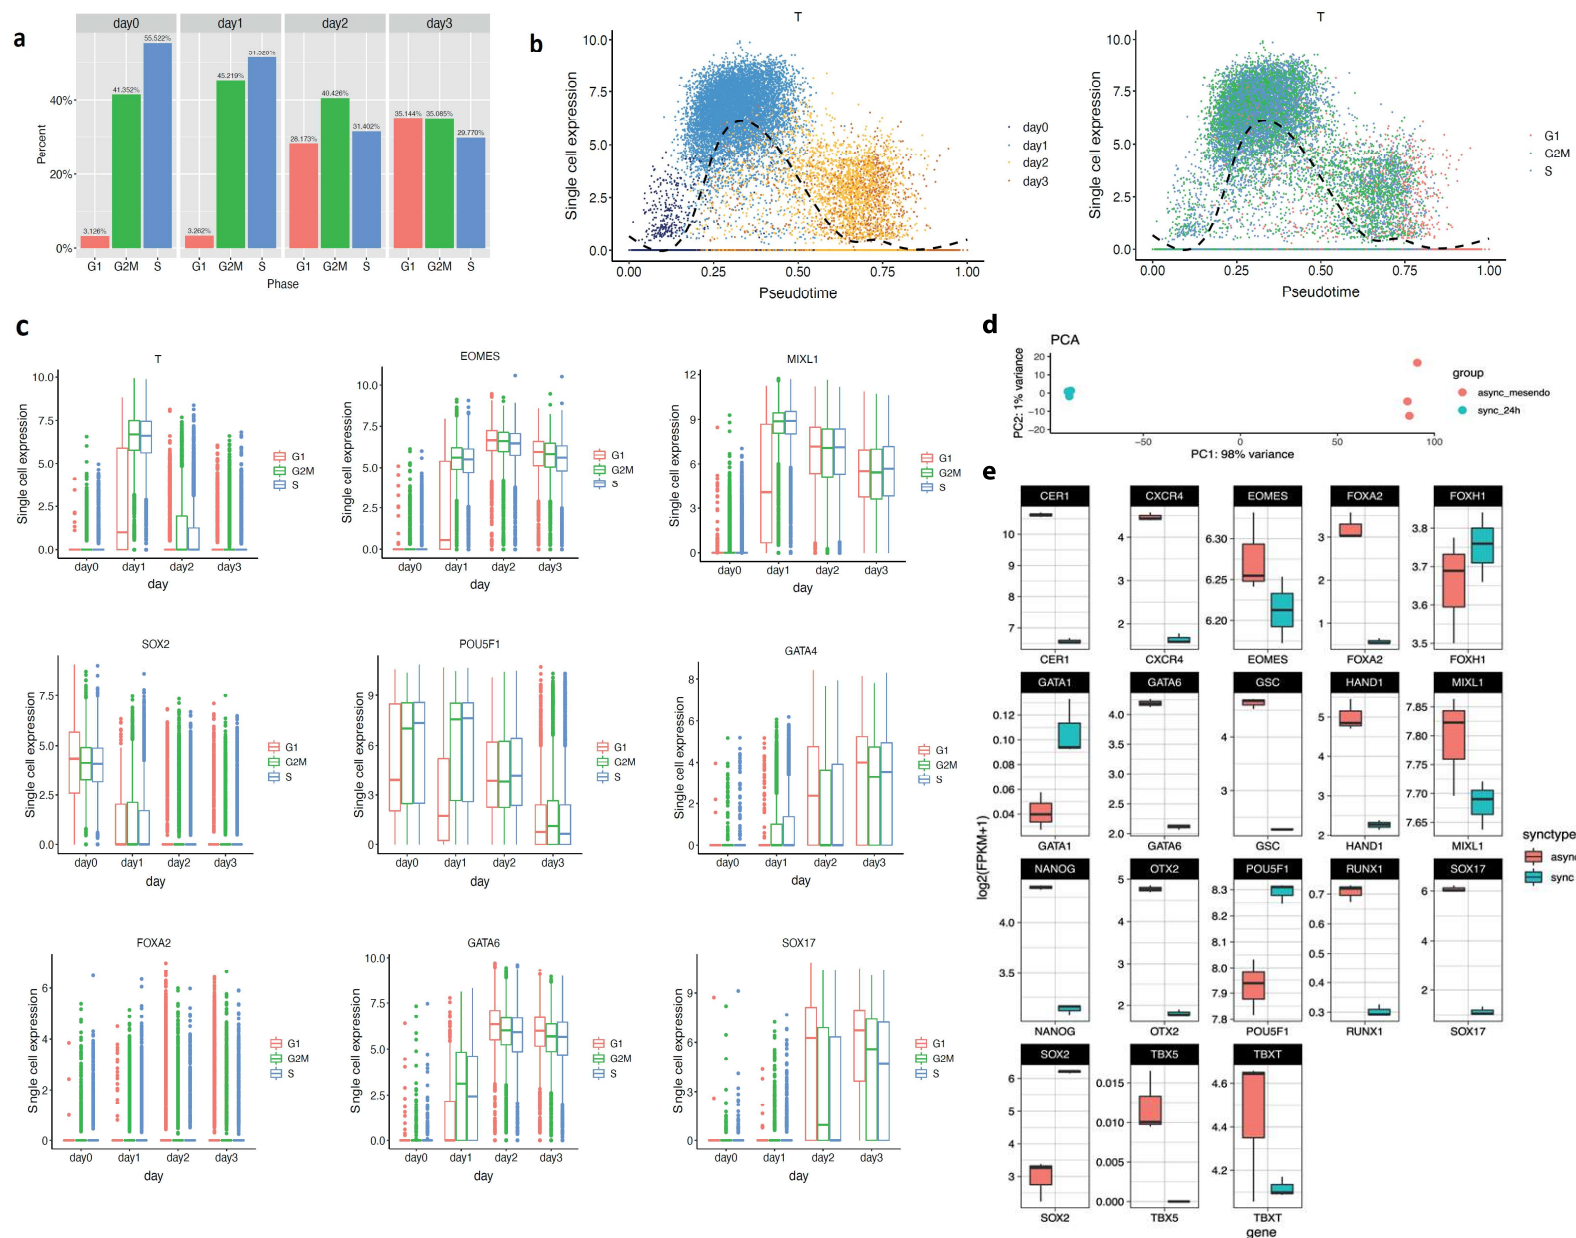

**Supplementary Figure 2: Cell cycle phase assignment to a single-cell RNA sequencing dataset (36,044 cells) of asynchronous endoderm differentiation.**

(a) Percentage of cells assigned to each cell cycle phase. (b) Single cell expression (y-axis) of mesendoderm marker T, plotted along pseudotime (x-axis). The black dashed line indicates the smoothed mean. (c) Boxplots representing the distribution of gene expression values of selected markers in all cells for each developmental stage in each assigned cell cycle phase. Gene expression values correspond to  $\log_2(\text{Counts Per Million} + 1)$ . The boxes show the interquartile range, with the median marked as heavy horizontal band. Whiskers represent the highest (lowest) datapoint within 1.5 times the interquartile range of the 75th (25th) percentile. Outliers are plotted separately as individual points beyond the whiskers on the boxplot. (d) Principal Component Analysis of synchronised and unsynchronised differentiation at 24 hours. Cells were analysed by bulk RNA-seq. Unsynchronised RNA-seq data was obtained from Valcourt et al. 42 (e) Comparative expression of marker genes in unsynchronised and synchronised cells at 24 hours of endodermal differentiation. The boxes show the interquartile range, with the median marked as heavy horizontal band. Whiskers represent the highest (lowest) datapoint within 1.5 times the interquartile range of the 75th (25th) percentile. Data in (c) and (e) depicts  $n = 3$  biologically independent samples over an independent experiment.

**a**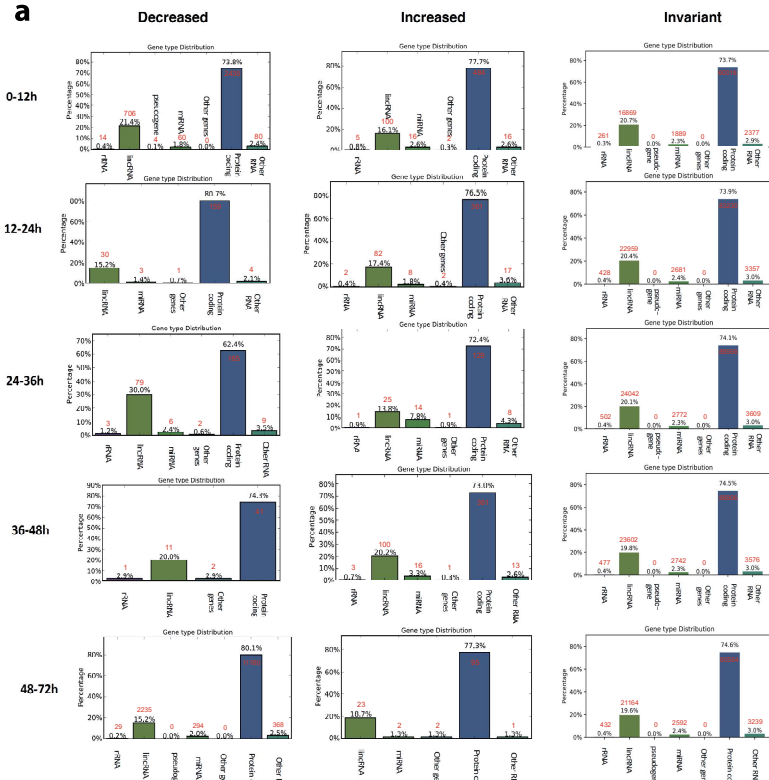**b**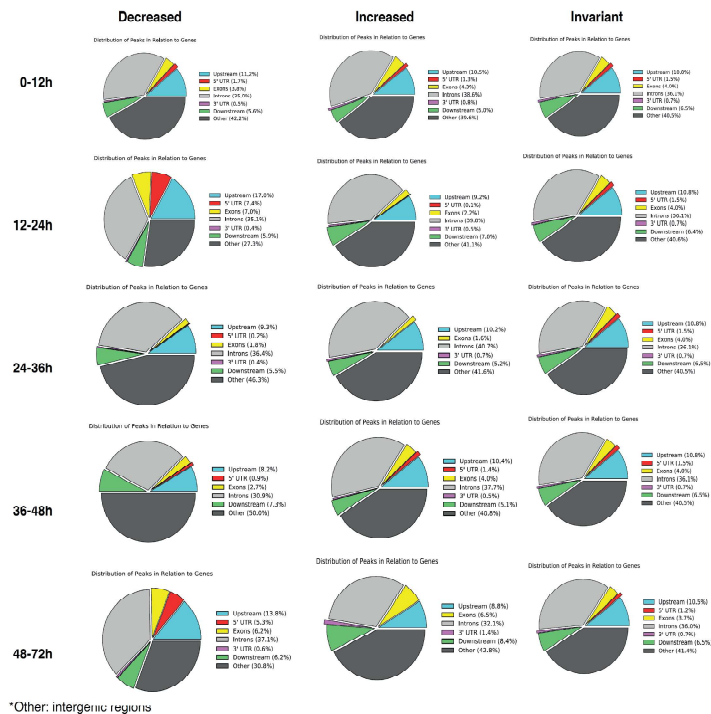**c**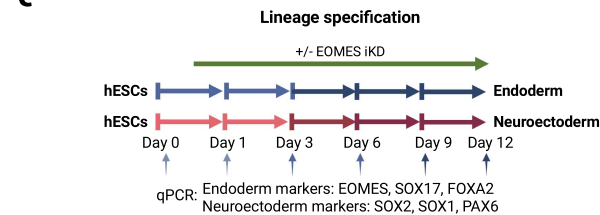**d**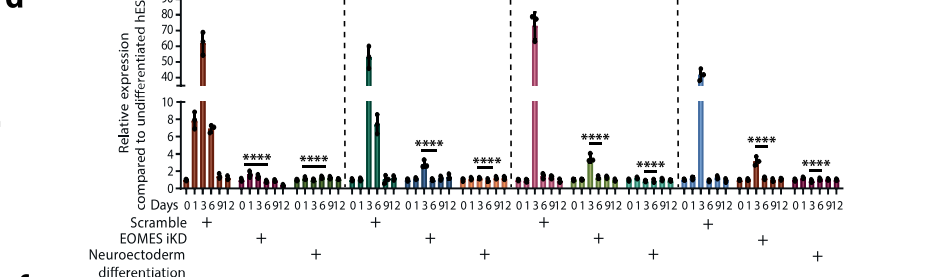**e**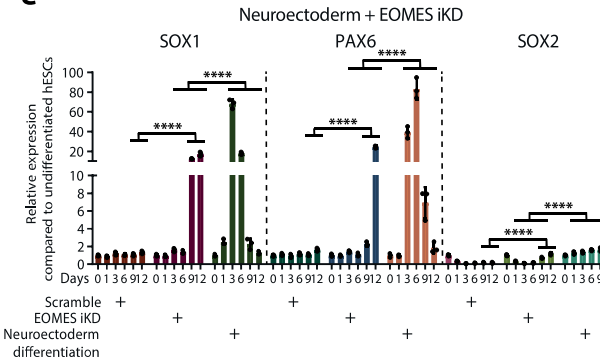**f**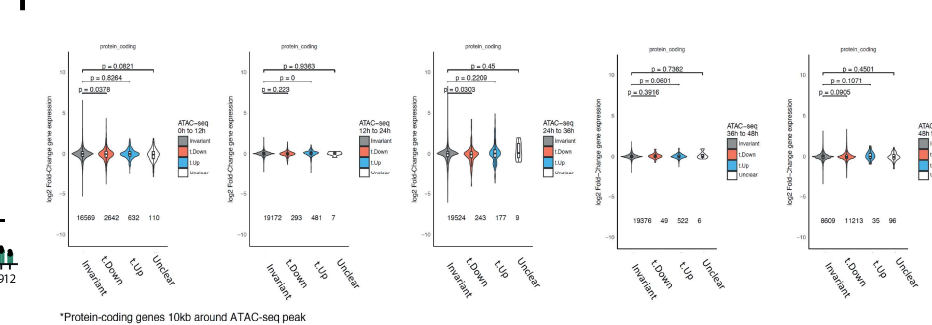**g**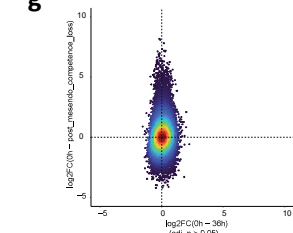**h**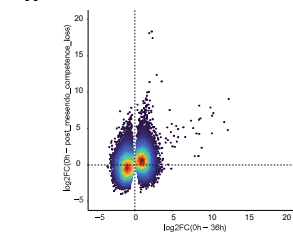**i**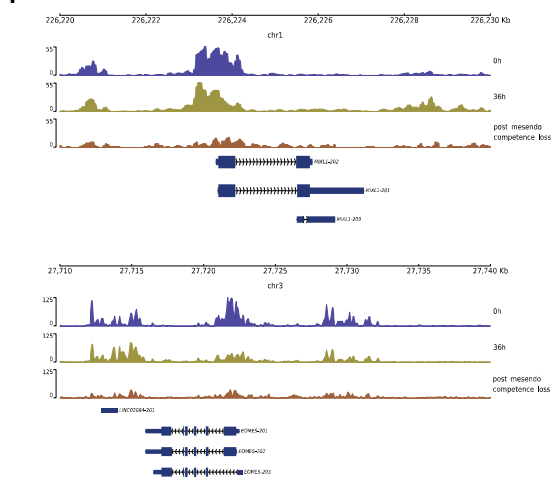**j**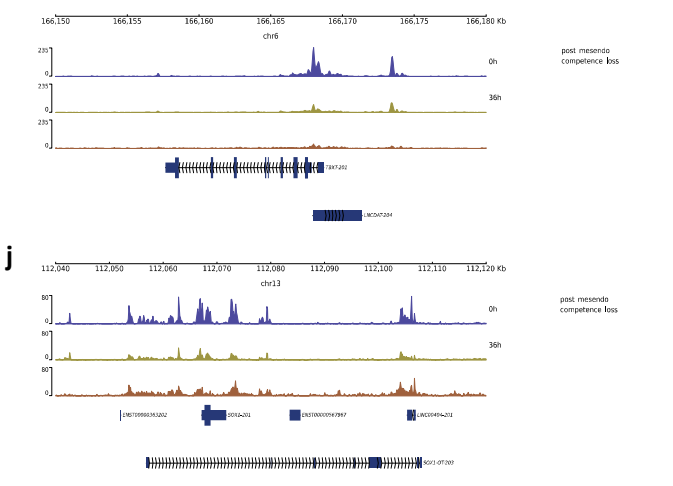

**Supplementary Figure 3: Characterization of genomic regions displaying changes in chromatin accessibility during differentiation.**

(a) Annotation of chromatin accessibility peaks to gene category during differentiation of cell synchronised EGI-FUCCI hPSCs. Numbers in red colour represent the number of regions. (b) Annotation of chromatin accessibility peaks to intra- or inter-genic regions. (c) Schematic representation of the lineage specification experiment for analysing the effects of inducible EOMES knockdown on hESC differentiation. (d-e) The effects of EOMES knockdown on endoderm marker expression (d) and neuroectoderm marker expression (e). (f) Distribution of log<sub>2</sub> fold-changes in RNA expression in regions with decreased, increased, or invariant chromatin accessibility defined by ATAC-seq. P-values reported by non-parametric two-sided Wilcoxon Rank Sum test. Analysis performed on protein-coding genes located 10 kb around ATAC-seq peaks. The distribution is shown as a violin plot wrapping a boxplot, where the median of the data is marked as a heavy horizontal line and the box indicates the interquartile range. Data in (d) to (f) depicts n = 3 biologically independent samples over an independent experiment. (g) Dot plot of genomic regions which were not changed significantly (P > 0.05) in the 0h undifferentiated cells compared to endoderm differentiated cells at 36h or neuroectoderm cells/post mesendo competence loss. X- and Y-axis are in log<sub>2</sub> scale. (h) Dot plot of genomic regions which were changed significantly (P < 0.05) in the 0h undifferentiated cells compared to endoderm differentiated cells at 36h or neuroectoderm cells/ post mesendo competence loss. X- and Y-axis are in log<sub>2</sub> scale. (i) Genomic regions of MIXL1, T and EOMES loci showing genome accessibility by ATAC-seq data visualisation. (j) The genomic region of the SOX1 locus shows genome accessibility by ATAC-seq data visualisation. Statistical analysis in (d, e) was performed by two-way ANOVA with Tukey's multiple comparisons tests and \* marks adjusted P-value < 0.05 and \*\* marks adjusted P-value < 0.01, \*\*\* marks adjusted P-value < 0.001, \*\*\*\* marks adjusted P-value < 0.0001. Data are presented as mean values +/- SD. Source data are provided as a Source Data file.



**a**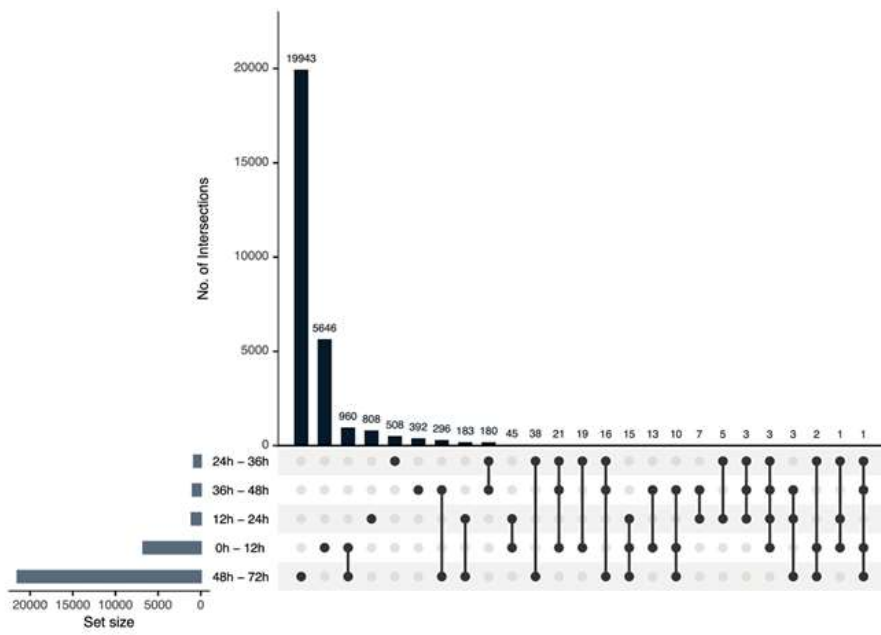**b**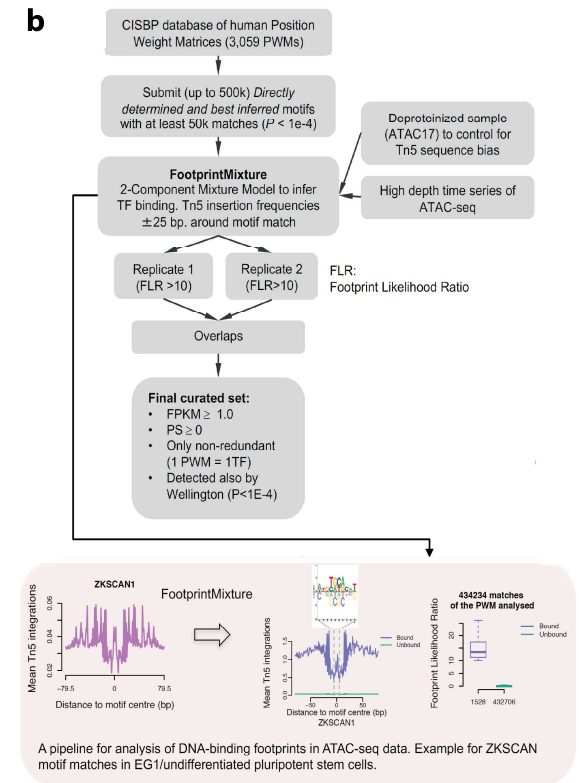**c**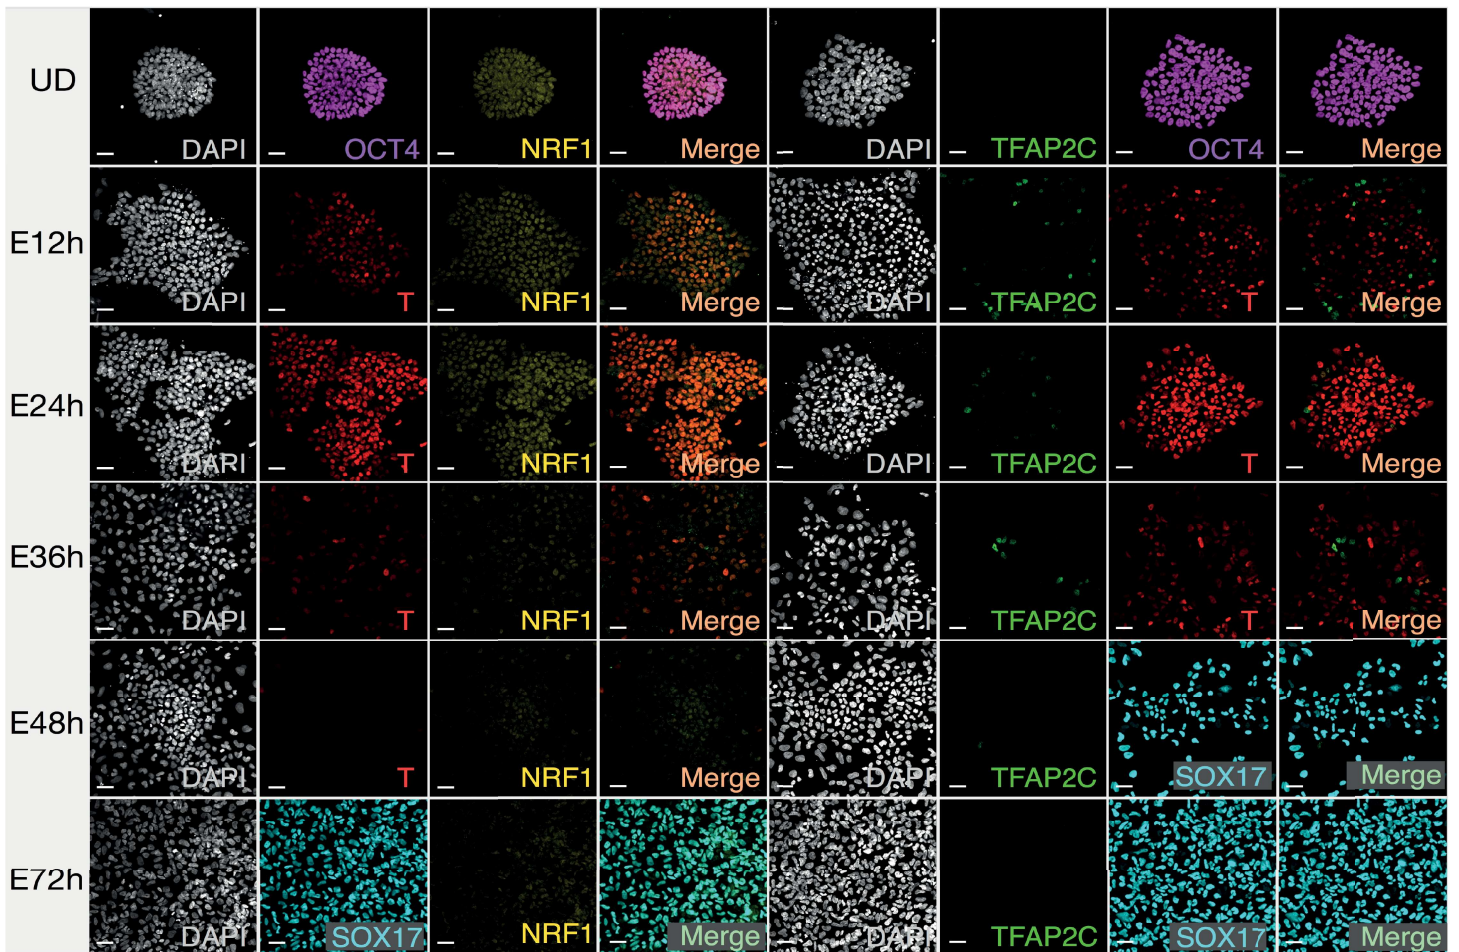

**Supplementary Figure 4: Transcription factor footprinting analysis in chromatin accessibility regions during endoderm differentiation and immunofluorescence microscopy.**

(a) Overlap analysis of differential chromatin accessibility regions between timepoints during endoderm differentiation. (b) Computational pipeline for digital genomic footprinting in ATAC-seq data to identify transcription factors footprints during endoderm differentiation. Example for ZKSCAN1 motif matches for CisBP Position Weight Matrix M4646 at 0 h. (c) Immunofluorescence microscopy staining of OCT4, NRF1, T, TFAP2C and SOX17 in synchronised hESCs during endoderm differentiation. The scale bar represents 100 $\mu$ m.

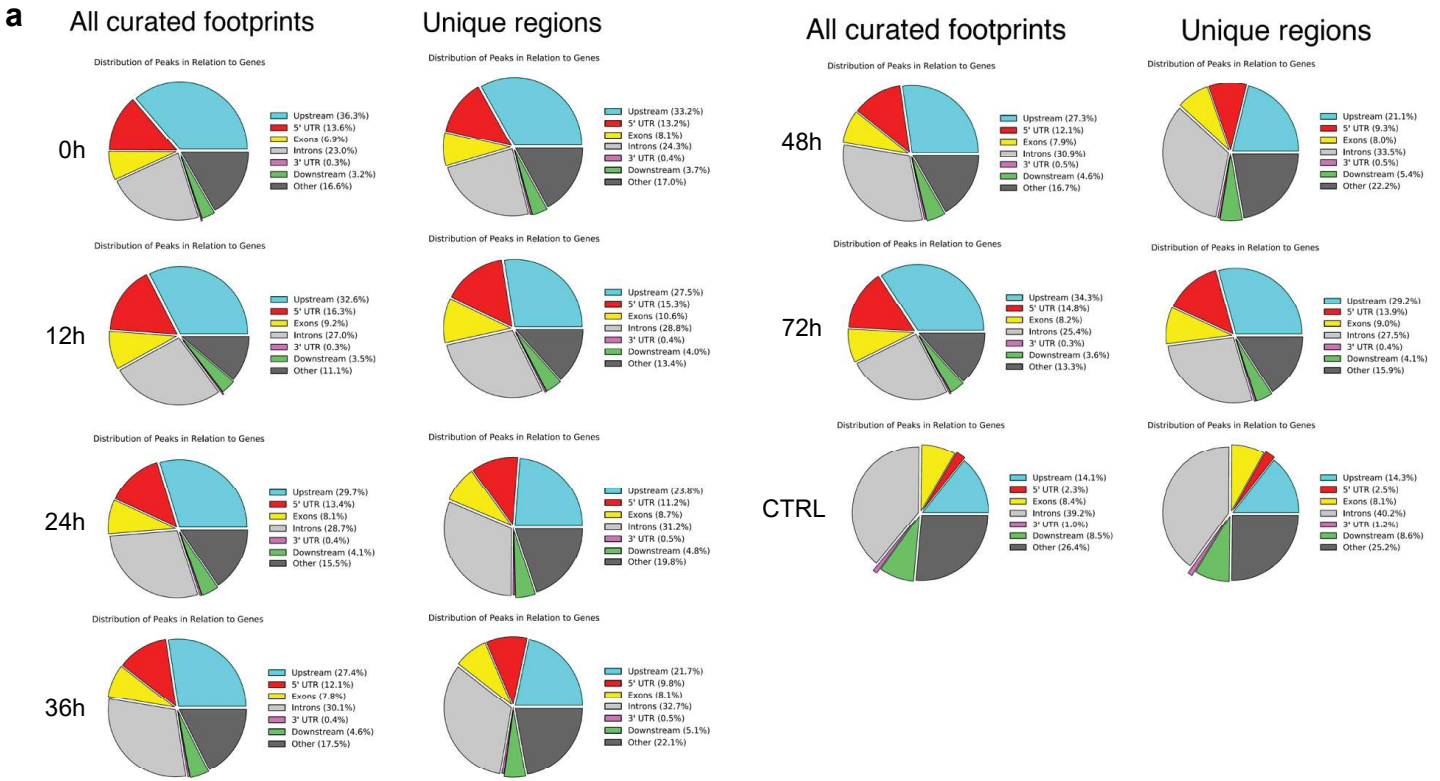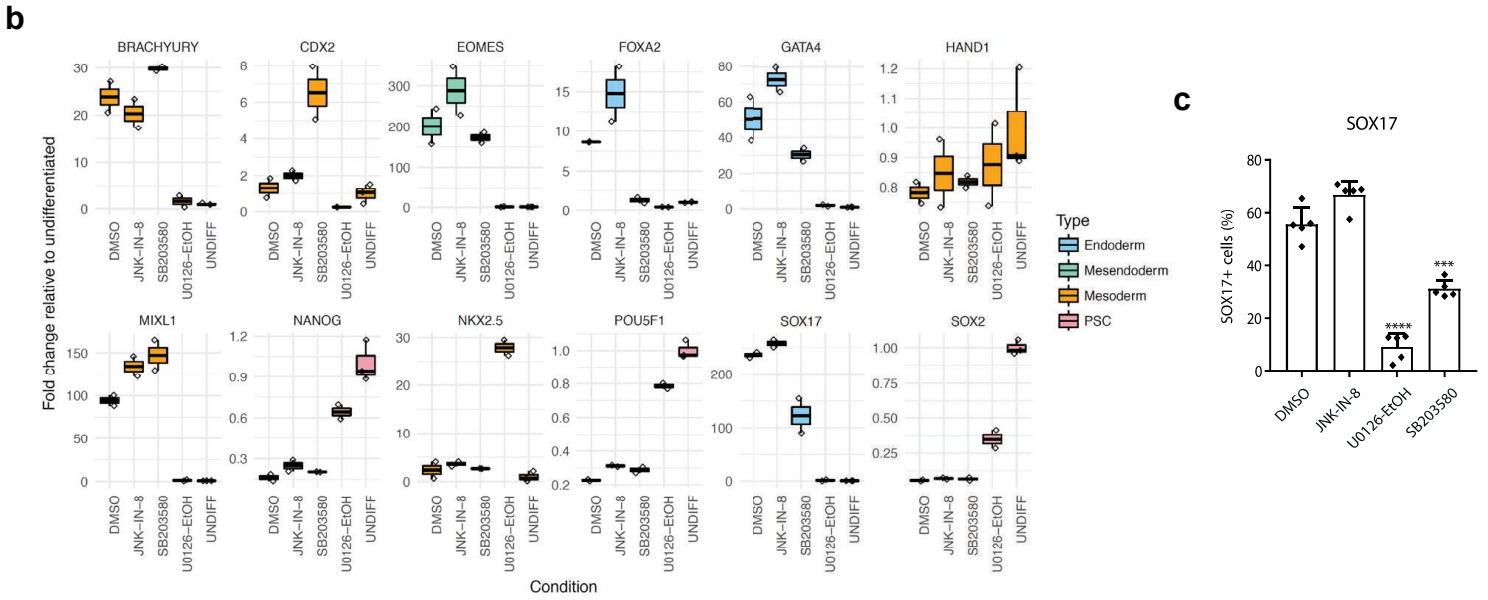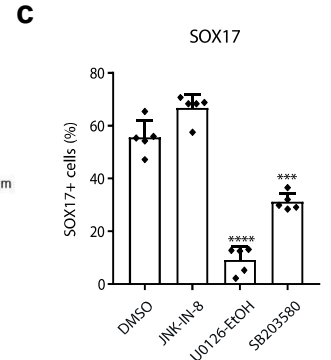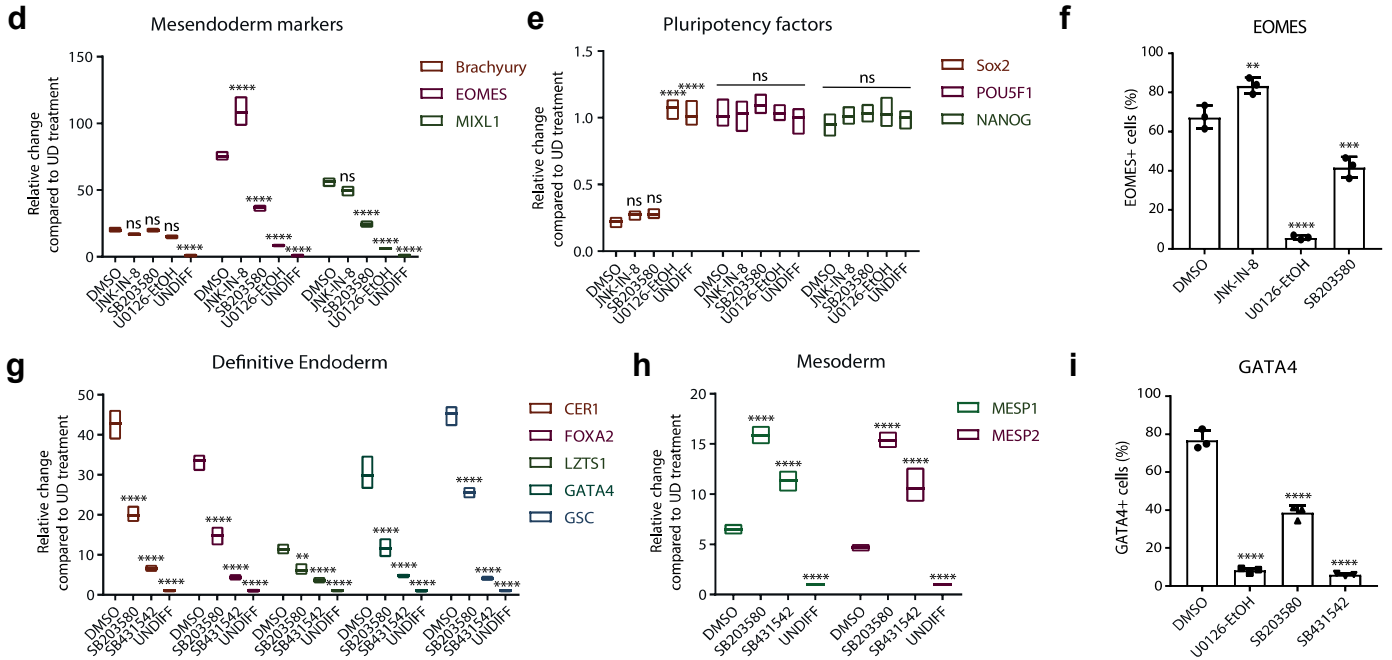

**Supplementary Figure 5: Transcription factor binding footprint characterisation and experimental work with pathway inhibitors.**

(a) Annotation of transcription factor footprints into intra- or inter-genic regions. A deproteinised (naked DNA) ATAC-seq sample was used as a control. (b) Q-PCR analyses showing the effect of different inhibitors of AP1-related signalling pathways on the expression of pluripotency (NANOG, POU5F1/OCT4 and SOX2), mesoderm (BRACHYURY/T, CDX2, NKX2.5, HAND1, MIXL1) and endoderm markers (FOXA2, SOX17, GATA4, EOMES). cA1ATD hPSC line was grown for 3 days in culture conditions inducing endoderm differentiation in the presence of DMSO (control), JNK-in-8, SB 203580, U0126. cA1ATD hPSCs grown in culture condition maintaining pluripotency were used as negative control. For Q-PCR, the boxes show the interquartile range, with the median marked as heavy horizontal band. Whiskers represent the highest (lowest) datapoint within 1.5 times the interquartile range of the 75th (25th) percentile. The diamonds represent each data point. (c) FACS analyses showing the expression of the endoderm marker SOX17 in cA1ATD hPSCs differentiated into endoderm in the presence of the denoted inhibitors. (d-e) The impact of JNK-in-8, SB 203580, and U0126-EtOH on the expression of (d) mesendoderm markers and (e) pluripotency markers at 24 h of endoderm differentiation. (f) Flow cytometry analysis of EOMES expression upon the treatment with JNK-in-8, SB 203580, and U0126. (g-h) The impact of SB 203580 and SB431542 on the expression of (g) definitive endoderm markers and (h) mesoderm markers at 36 h of endoderm differentiation. (i) Flow cytometry analysis of GATA4 expression upon the treatment with U0126-EtOH, SB 203580, and U0126-EtOH. The bounds of box plots in (d, e, g and h) represent minima, maxima, and the horizontal line represents the mean of experiments. One-way ANOVA in (c, f, i) was performed followed by Dunnett's multiple comparisons test where each of the 3 treatment conditions was compared against the control. Statistical analysis in (d, e, g, h) was performed by two-way ANOVA with Tukey's multiple comparisons tests and \* marks adjusted P-value < 0.05 and \*\* marks adjusted P-value < 0.01, \*\*\* marks adjusted P-value < 0.001, \*\*\*\* marks adjusted P-value < 0.0001. Data in (c) to (i) depicts n = 3 biologically independent experiment. Data are presented as mean values +/- SD. Source data are provided as a Source Data file. Specific P-values shown in figures are listed in the Source Data file.



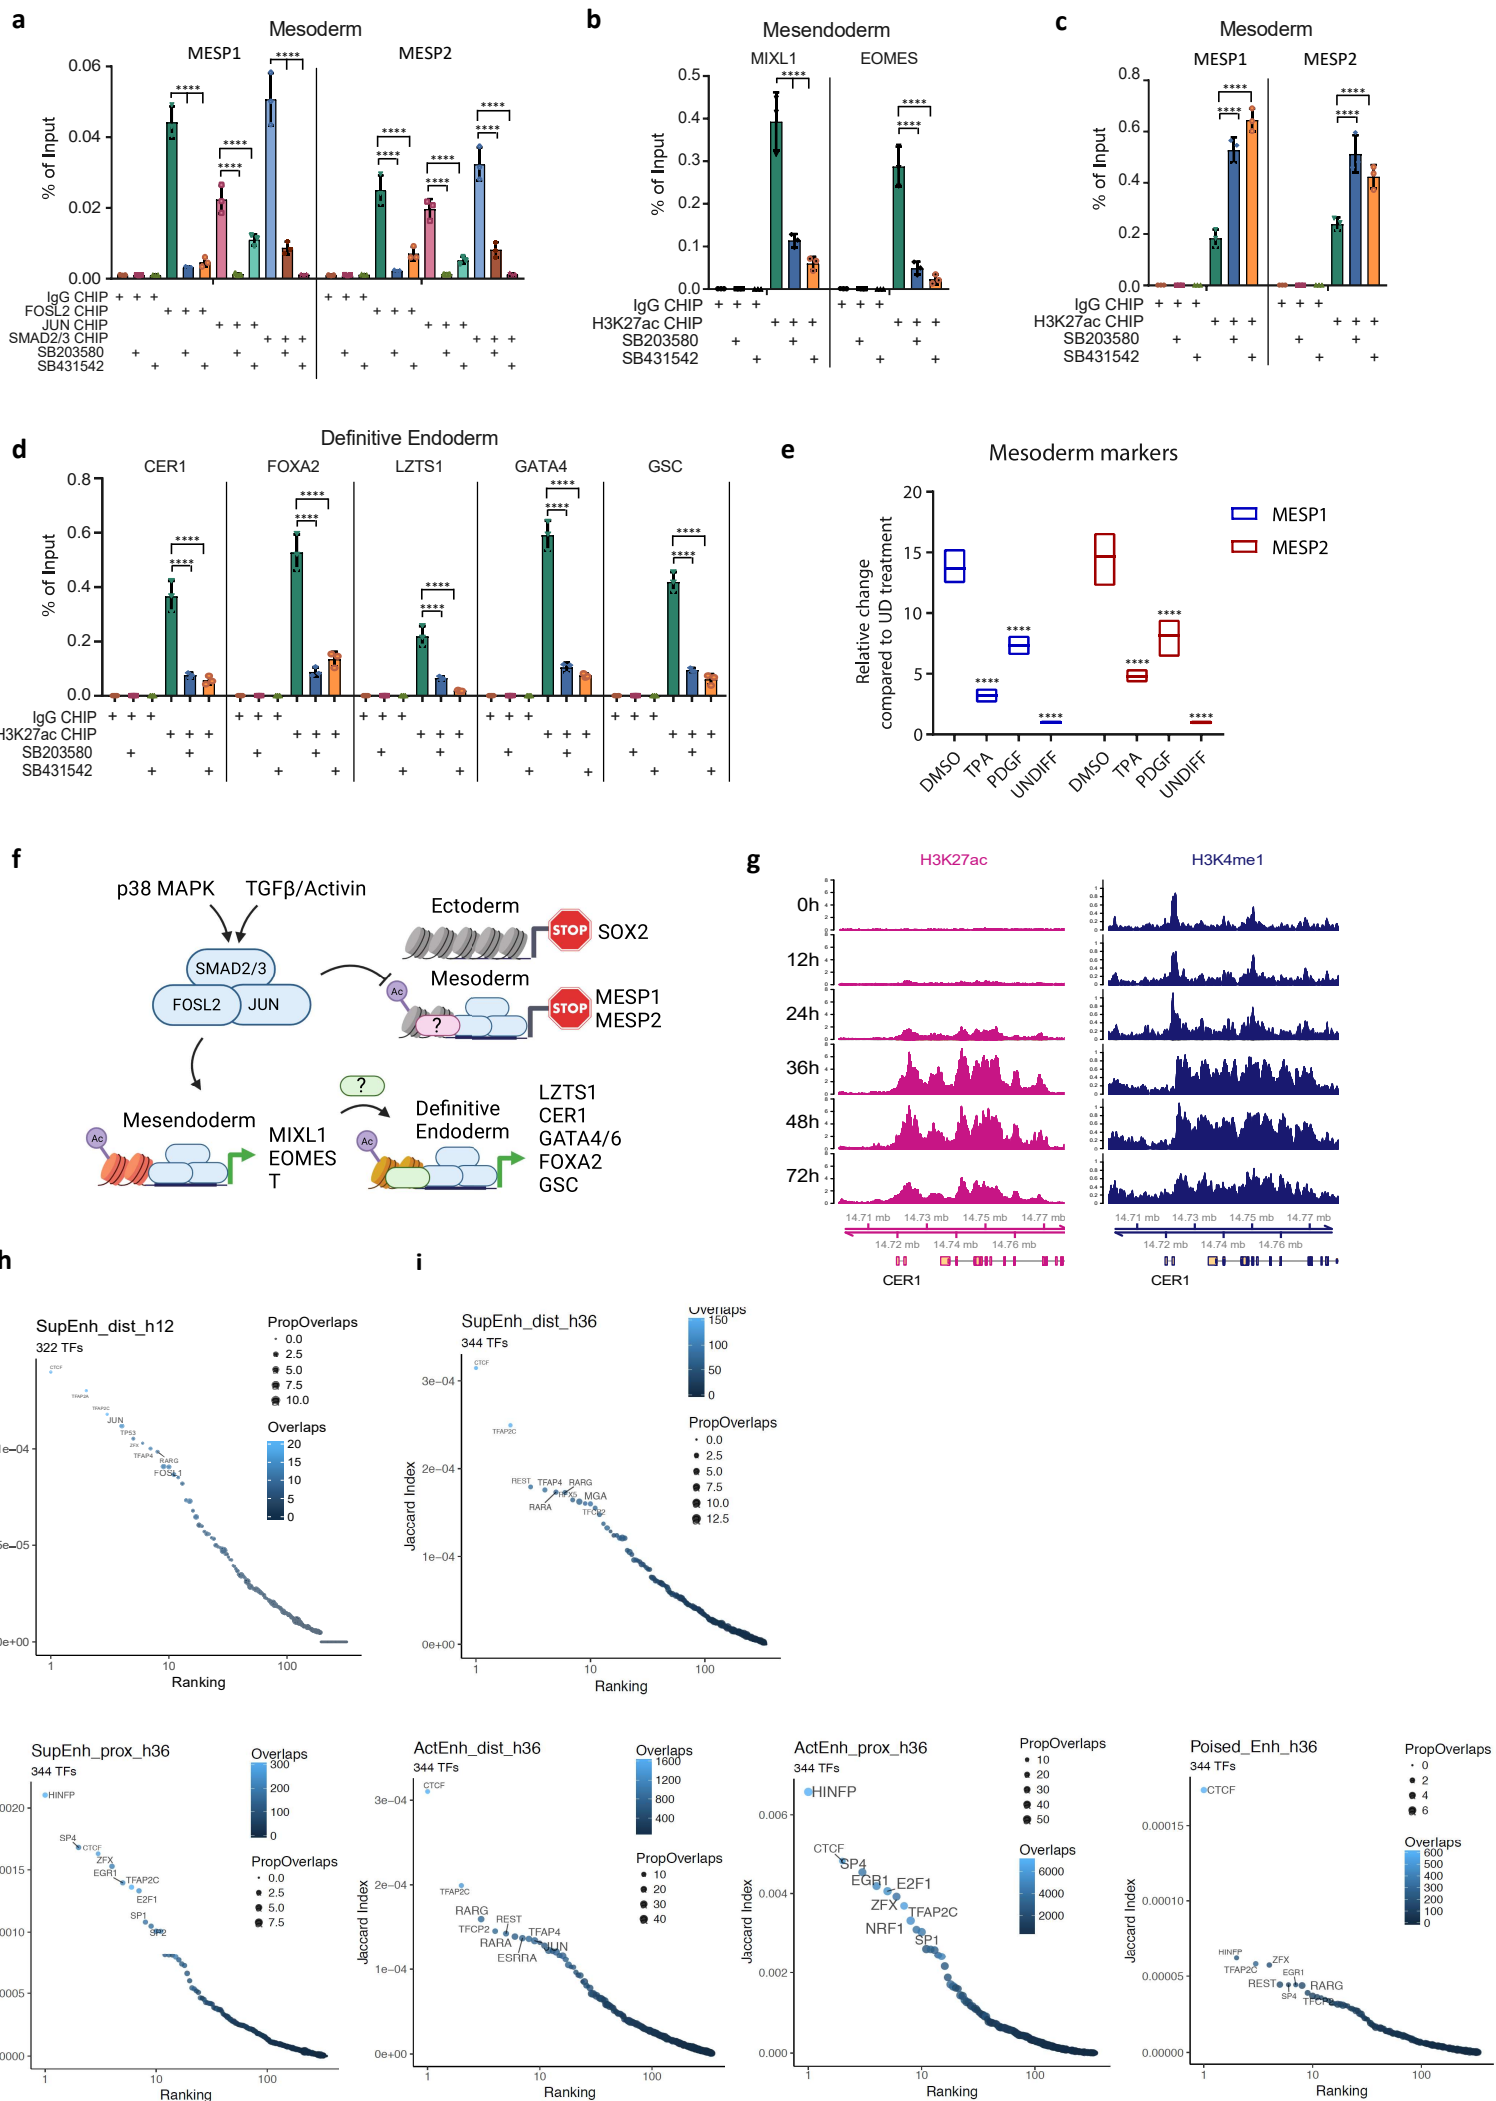

**Supplementary Figure 6: p38-MAPK and TGFβ/Activin A signalling co-regulate AP-1 TFs and SMAD2/3 binding to germ layer loci at different stages of endoderm differentiation.**

(a) p38-MAPK and TGFβ/Activin A signalling co-regulate AP-1 TFs FOSL2/JUN and SMAD2/3 binding to mesoderm genes MESP1 and MESP2 at 36 h time point after initiating endoderm differentiation. Early G1 phase synchronised cells were differentiated to endoderm for 36 h and treated with p38 MAPK and TGFβ/Activin A inhibitors for 12h as shown in Fig. 4g, followed by ChIP-qPCR. (b-d) p38-MAPK and TGFβ/Activin A signalling inhibition lead to the loss of H3K27ac modifications on regulatory regions of (b) primitive streak/mesendoderm genes MIXL1 and EOMES, (c) mesoderm genes MESP1 and MESP2, and (d) definitive endoderm genes CER1, FOXA2, LZTS1, GATA4, GSC. Statistical analysis was performed by 2-way ANOVA with multiple comparisons and \*\*\*\* marks adjusted P-value < 0.0001. (e) The effects of TPA and PDGF on mesoderm marker MESP1 and MESP2 expression in embryoid body formation conditions. The bounds of box plots in (e) represent minima, maxima, and the horizontal line represents the mean of experiments. Statistical analysis in (a-e) was performed by two-way ANOVA with Tukey's multiple comparisons tests and \* marks adjusted P-value < 0.05 and \*\* marks adjusted P-value < 0.01, \*\*\* marks adjusted P-value < 0.001, \*\*\*\* marks adjusted P-value < 0.0001. Data in (a) to (e) depicts n = 3 biologically independent experiments. Data are presented as mean values +/- SD. (f) Schematic representation of the role of p38 MAPK-AP1 and TGFβ/Activin A-SMAD2/3 signalling pathways in regulating the specification of definitive endoderm at multiple differentiation stages. p38 MAPK and TGFβ/Activin A cooperate in signalling to SMAD2/3 and AP-1 TFs FOSL2/JUN which form an activative transcriptional complex (light blue) on mesendoderm loci. The complex induces activative histone modifications (H3K27ac, purple circle) at the key transcriptional regulator loci MIXL1 and EOMES that direct cellular specification to the next step by gene expression changes. Following the cellular transition through the mesendoderm stage, the SMAD2/3 and FOSL2/JUN complex is involved in increasing H3K27ac and the expression of definitive endoderm transcription factors CER1, GATA4/6, FOXA2, GSC, and LZTS1. SMAD2/3 and FOSL2/JUN complex could cooperate with mesendoderm TFs such as EOMES (light green) that help to target SMAD2/3-FOSL2/JUN complex to definitive endoderm TFs loci and induce their expression by co-binding with GATA4 and other definitive endoderm factors. At this stage, SMAD2/3-FOSL2/JUN complex also participate in the transient repression of MESP1 and MESP2 loci which could involve additional transcriptional regulators (pink). This suggests a mechanism by which SMAD2/3 together with other transcription factors forms a feed-forward mechanism that directs gradual stem cell differentiation, and could help to explain molecular mechanisms that are involved in cell-autonomous formation of complex tissues. Created with BioRender.com. (g) Super-enhancers found close to CER1 locus. (h-i) Association of TF footprints with distal super enhancer regions. Jaccard Index, total number of footprint overlaps with the differential region (Overlaps), and percentage of footprints of a TF that overlap with this region (PropOverlaps) at 12h (h) and 36h (i). (j) Jaccard Index between FPs and proximal super enhancers, active distal super enhancers, active proximal enhancers, and poised enhancers at 36h. Data are presented as mean values +/- SD. Source data are provided as a Source Data file. Specific P-values shown in figures are listed in the Source Data file.

**a**

FACS gating strategy for cell sorting experiments: Figure 1A

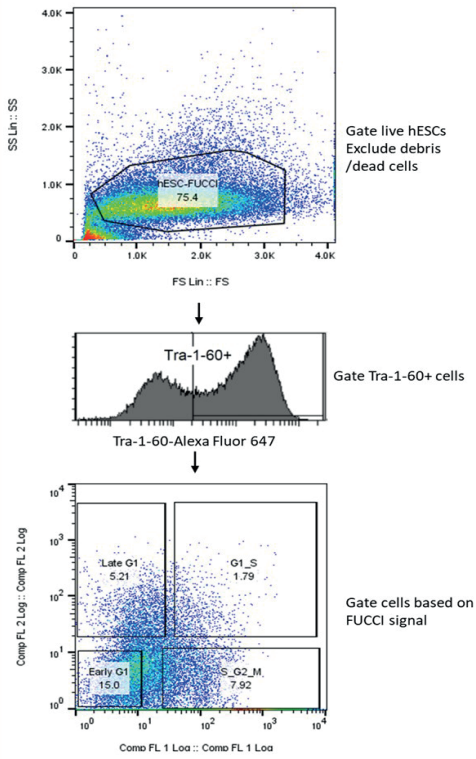**b**

Flow cytometry gating strategy for  
Figure 4c; Supplementary Fig. 5c

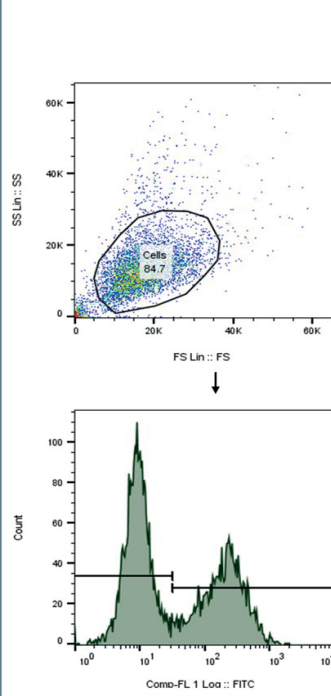**c**

Flow cytometry gating strategy for  
Supplementary Fig. 5f, 5i

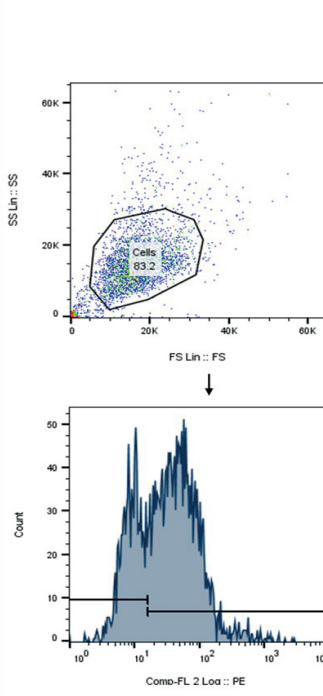**d**

Flow cytometry gating strategy for  
Figure 4k-l

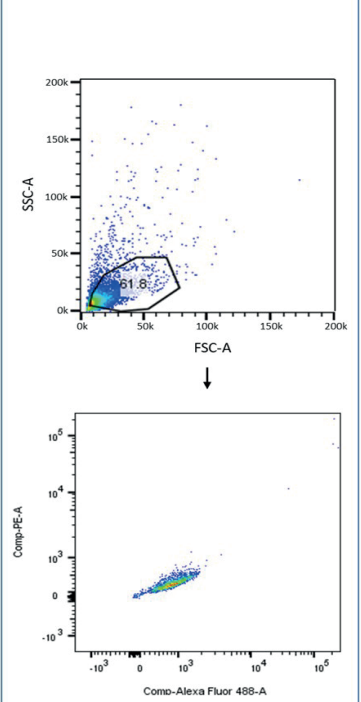

### Supplementary Figure 7. Gating strategy for cell sorting and flow cytometry experiments.

(a) FACS gating strategy for cell sorting experiments for Figure 1A. (b) Flow cytometry gating strategy for Figure 4c and Supplementary Figure 5c. (c) Flow cytometry gating strategy for Supplementary Figure 5f and 5i. (d) Flow cytometry gating strategy for Figure 4k-l.
