# Supplementary material for: Epigenetic and transcriptional regulations prime cell fate before division during human pluripotent stem cell differentiation
Source: PubMed Central journal article supplement (PMC9876972; doi:10.1038/s41467-023-36116-9), 2023-01-25
Supplement: 41467_2023_36116_MOESM5_ESM.pdf [file 41467_2023_36116_MOESM5_ESM.pdf]

## Reporting Summary

Nature Portfolio wishes to improve the reproducibility of the work that we publish. This form provides structure for consistency and transparency in reporting. For further information on Nature Portfolio policies, see our [Editorial Policies](#) and the [Editorial Policy Checklist](#).

### Statistics

For all statistical analyses, confirm that the following items are present in the figure legend, table legend, main text, or Methods section.

n/a | Confirmed

- The exact sample size ( $n$ ) for each experimental group/condition, given as a discrete number and unit of measurement
- A statement on whether measurements were taken from distinct samples or whether the same sample was measured repeatedly
- The statistical test(s) used AND whether they are one- or two-sided  
*Only common tests should be described solely by name; describe more complex techniques in the Methods section.*
- A description of all covariates tested
- A description of any assumptions or corrections, such as tests of normality and adjustment for multiple comparisons
- A full description of the statistical parameters including central tendency (e.g. means) or other basic estimates (e.g. regression coefficient) AND variation (e.g. standard deviation) or associated estimates of uncertainty (e.g. confidence intervals)
- For null hypothesis testing, the test statistic (e.g.  $F$ ,  $t$ ,  $r$ ) with confidence intervals, effect sizes, degrees of freedom and  $P$  value noted  
*Give  $P$  values as exact values whenever suitable.*
- For Bayesian analysis, information on the choice of priors and Markov chain Monte Carlo settings
- For hierarchical and complex designs, identification of the appropriate level for tests and full reporting of outcomes
- Estimates of effect sizes (e.g. Cohen's  $d$ , Pearson's  $r$ ), indicating how they were calculated

*Our web collection on [statistics for biologists](#) contains articles on many of the points above.*

### Software and code

Policy information about [availability of computer code](#)

Data collection

Data analysis https://github.com/pmb59/endoderm/ (<https://doi.org/10.5281/zenodo.7436993>).

For manuscripts utilizing custom algorithms or software that are central to the research but not yet described in published literature, software must be made available to editors and reviewers. We strongly encourage code deposition in a community repository (e.g. GitHub). See the Nature Portfolio [guidelines for submitting code & software](#) for further information.

### Data

Policy information about [availability of data](#)

All manuscripts must include a [data availability statement](#). This statement should provide the following information, where applicable:

- Accession codes, unique identifiers, or web links for publicly available datasets
- A description of any restrictions on data availability
- For clinical datasets or third party data, please ensure that the statement adheres to our [policy](#)

Processed genome-wide datasets are publicly accessible in a genome browser at <http://ngs.sanger.ac.uk/production/endoderm>. Raw ChIP-seq data collected at 0 h, 24 h, 48 h, and 72 h is available at GEO DataSets (PRJNA593217). Raw ChIP-seq for 12 h and 36 h, ATAC-seq and RNA-seq data are publicly available in ArrayExpress

under accessions E-MTAB-9276, E-MTAB-9124 and E-MTAB-9194, respectively. Any databases/datasets used in the study are mentioned under the "Data availability" section in the manuscript.

## Human research participants

Policy information about [studies involving human research participants and Sex and Gender in Research](#).

Reporting on sex and gender

Population characteristics

Recruitment

Ethics oversight

Note that full information on the approval of the study protocol must also be provided in the manuscript.

## Field-specific reporting

Please select the one below that is the best fit for your research. If you are not sure, read the appropriate sections before making your selection.

Life sciences  Behavioural & social sciences  Ecological, evolutionary & environmental sciences

For a reference copy of the document with all sections, see [nature.com/documents/nr-reporting-summary-flat.pdf](https://nature.com/documents/nr-reporting-summary-flat.pdf)

## Life sciences study design

All studies must disclose on these points even when the disclosure is negative.

Sample size

Data exclusions

Replication

Randomization

Blinding

## Reporting for specific materials, systems and methods

We require information from authors about some types of materials, experimental systems and methods used in many studies. Here, indicate whether each material, system or method listed is relevant to your study. If you are not sure if a list item applies to your research, read the appropriate section before selecting a response.

### Materials & experimental systems

| n/a                                 | Involved in the study                                     |
|-------------------------------------|-----------------------------------------------------------|
| <input type="checkbox"/>            | <input checked="" type="checkbox"/> Antibodies            |
| <input type="checkbox"/>            | <input checked="" type="checkbox"/> Eukaryotic cell lines |
| <input checked="" type="checkbox"/> | <input type="checkbox"/> Palaeontology and archaeology    |
| <input checked="" type="checkbox"/> | <input type="checkbox"/> Animals and other organisms      |
| <input checked="" type="checkbox"/> | <input type="checkbox"/> Clinical data                    |
| <input checked="" type="checkbox"/> | <input type="checkbox"/> Dual use research of concern     |

### Methods

| n/a                                 | Involved in the study                              |
|-------------------------------------|----------------------------------------------------|
| <input type="checkbox"/>            | <input checked="" type="checkbox"/> ChIP-seq       |
| <input type="checkbox"/>            | <input checked="" type="checkbox"/> Flow cytometry |
| <input checked="" type="checkbox"/> | <input type="checkbox"/> MRI-based neuroimaging    |

## Antibodies

Antibodies used

flow cytometry, and 10µg per sample for ChIP unless otherwise specified. Secondary antibodies were used at 1:10,000 dilution for western blotting, and at 1:1000 for Immunofluorescence microscopy and flow cytometry unless otherwise specified.

Antibody raised against, Catalog number, Company, Clone/Lot

Histone H3 ab1791 Abcam Poly  
 Histone H3 (tri methyl K4) ab8580 Abcam Poly  
 Histone H3 (tri methyl K27) C15200181  
 (MAB-181-050) Diagenode 001-13  
 Histone H3 (mono methyl K4) ab8895 Abcam Poly  
 Histone H3 (acetyl K27) ab4729 Abcam Poly  
 Histone H3 (tri methyl K36) ab9050 Abcam Poly  
 Actin, clone C4 MAB1501 Chemicon AC-74  
 Brachyury (T) af2085 R&D Systems Poly  
 EOMES ab23345 Abcam Poly  
 Nanog af1997 R&D Systems Poly  
 Nestin (Rat-401) sc-33677 Santa Cruz RAT-401  
 Oct-3/4 (C-10) sc-5279 Santa Cruz C-10  
 Pax6 PRB-278P-100 Covance Poly  
 Sox1 AF3369 R&D Systems Poly  
 Sox17 AF1924 R&D Systems Poly  
 Sox2 AF2018 R&D Systems Poly  
 CXCR4 MAB173 R&D Systems 44717  
 Tra-1-60 sc-21705 Santa Cruz  
 FRA2 (D2F1E) 19967S Cell Signaling Technology D2F1E  
 JUN 22114-1-AP Proteintech Poly  
 c-JUN (60A8) 9165T Cell Signaling Technology 60A8  
 SMAD2/3 AF3797 Bio-Techne Poly  
 GATA4 104604-T36 Sino Biological Poly  
 PDX1 AF2419 Bio-Techne Poly  
 SOX9 ab185230 AbCam EPR14335  
 APC anti-human CD142 [NY2] 365205 Biolegend NY2  
 Alexa Fluor 647 goat α-mouse IgM A21238 Invitrogen Poly  
 Alexa Fluor 647 donkey α-mouse IgG A31571 Invitrogen Poly  
 Alexa Fluor 647 donkey α-goat A21447 Invitrogen Poly

## Validation

We used only commercial antibodies which have all been validated by the company selling the antibody. The antibodies have been validated for specificity by using gene knockouts/knockdowns and immunoprecipitation techniques as described by the companies selling the antibodies. Besides this, the antibodies have been further validated in publications citing the antibodies.

## Eukaryotic cell lines

Policy information about [cell lines and Sex and Gender in Research](#)

## Cell line source(s)

H9 from WiCell  
 hiPSC lines were obtained from the James and Lillian Martin Centre for Stem Cell Research and the Wellcome Sanger Institute.

## Authentication

All cell lines have been authenticated by the providers by using cell morphology, Karyotyping, and PCR assays with species-specific primers as well as gene expression profiling.

## Mycoplasma contamination

All cell lines tested negative for mycoplasma.

Commonly misidentified lines  
(See [ICLAC](#) register)

No commonly misidentified lines were used in this study.

## ChIP-seq

### Data deposition

Confirm that both raw and final processed data have been deposited in a public database such as [GEO](#).

Confirm that you have deposited or provided access to graph files (e.g. BED files) for the called peaks.

## Data access links

*May remain private before publication.*

All the raw ChIP-seq datasets are available in FASTQ format from ArrayExpress/BioStudies  
<https://www.ebi.ac.uk/biostudies/arrayexpress/studies/E-MTAB-9276>  
 and from GEO PRJNA593217  
<https://www.ncbi.nlm.nih.gov/bioproject/PRJNA593217/>

Final processed data is available from a website hosted at the Wellcome Sanger Institute:  
<http://ngs.sanger.ac.uk/production/endoderm/>  
 which include BED and bigWig files that can be visualized online in a genome browser.

## Files in database submission

See the links above for access (many files)

Genome browser session  
(e.g. [UCSC](#))

<http://ngs.sanger.ac.uk/production/endoderm>  
(with Biodalliance Genome Browser)

## Methodology

|                         |                                                                                                                                                                                                                                                                                                                                                                                                                                                        |
|-------------------------|--------------------------------------------------------------------------------------------------------------------------------------------------------------------------------------------------------------------------------------------------------------------------------------------------------------------------------------------------------------------------------------------------------------------------------------------------------|
| Replicates              | Two biological replicates per time point, per histone modification, except where indicated in Supplementary Methods.                                                                                                                                                                                                                                                                                                                                   |
| Sequencing depth        | Equimolar amounts of each library were pooled, and this multiplexed library was diluted to 8pM before sequencing using an Illumina HiSeq 2000 with 75 bp paired-end reads. More than 40bn reads were generated in total.                                                                                                                                                                                                                               |
| Antibodies              | All antibodies used are commercially available and have been verified by the company to be suitable for ChIP-seq experiments.<br>Antibody raised against Catalog number Company<br>Histone H3 ab1791 Abcam<br>Histone H3 (tri methyl K4) ab8580 Abcam<br>Histone H3 (tri methyl K27) C15200181 (MAb-181-050) Diagenode<br>Histone H3 (mono methyl K4) ab8895 Abcam<br>Histone H3 (acetyl K27) ab4729 Abcam<br>Histone H3 (tri methyl K36) ab9050 Abcam |
| Peak calling parameters | tool peakranger 1.18 in modes ranger (H3K4me3, H3K27ac; '-l 316 -b 200 -q 0.05'), ccat (H3K27me3; '-l 316 --win_size 1000 --win_step 100 --min_count 70 --min_score 7 -q 0.05') and bcp (H3K4me1, H3K36me3; '-l 316'). Adjacent peak regions closer than 40 bp were merged using the BEDTools suite. Only the peaks that were reproducible at an FDR of $\leq 0.05$ in two biological replicates were selected for further processing.                 |
| Data quality            | Only reads with mapping quality score $\geq 10$ and aligned to autosomal and sex chromosomes were kept for further processing.                                                                                                                                                                                                                                                                                                                         |
| Software                | BWA, peakranger, BEDTools                                                                                                                                                                                                                                                                                                                                                                                                                              |

## Flow Cytometry

### Plots

Confirm that:

- The axis labels state the marker and fluorochrome used (e.g. CD4-FITC).
- The axis scales are clearly visible. Include numbers along axes only for bottom left plot of group (a 'group' is an analysis of identical markers).
- All plots are contour plots with outliers or pseudocolor plots.
- A numerical value for number of cells or percentage (with statistics) is provided.

### Methodology

|                           |                                                                                                                                                                                                                                                                                                                                                                                                                                                                                                                                                                                                                                                                                                                                                                                                                                               |
|---------------------------|-----------------------------------------------------------------------------------------------------------------------------------------------------------------------------------------------------------------------------------------------------------------------------------------------------------------------------------------------------------------------------------------------------------------------------------------------------------------------------------------------------------------------------------------------------------------------------------------------------------------------------------------------------------------------------------------------------------------------------------------------------------------------------------------------------------------------------------------------|
| Sample preparation        | Single cell suspensions were prepared by incubation in Cell Dissociation Buffer (Gibco) for 10 minutes at 37° followed by gentle pipetting. Cells were fixed in 4% PFA for 20 min at 4°C. This was followed by permeabilization and blocking with 10% serum + 0.1% Triton X-100 in PBS for 30 min at RT and incubation with primary antibody in 1% serum + 0.1% Triton X-100 for 2h at 4°C. After washing the samples three times with PBS, they were incubated with a secondary antibody for 2h at 4°C, washed three times with PBS and analysed by flow cytometry. Flow-cytometry was performed using a Cyan ADP flow-cytometer and at least 20,000 events were recorded. Data was analysed by FlowJo software. Cell cycle distribution was analysed by Click-It EdU incorporation Kit (Invitrogen) according to manufacturer's guidelines. |
| Instrument                | Cyan ADP flow-cytometer                                                                                                                                                                                                                                                                                                                                                                                                                                                                                                                                                                                                                                                                                                                                                                                                                       |
| Software                  | FlowJo                                                                                                                                                                                                                                                                                                                                                                                                                                                                                                                                                                                                                                                                                                                                                                                                                                        |
| Cell population abundance | 20,000 events were recorded, subpopulations are generally above 1%.                                                                                                                                                                                                                                                                                                                                                                                                                                                                                                                                                                                                                                                                                                                                                                           |
| Gating strategy           | Cell doublets were removed by gating, and the positive gating according to forward and side scatter was performed by selecting events that excluded events that were clearly outsider the normal cell size thus representing cell debris and non-cellular counts.                                                                                                                                                                                                                                                                                                                                                                                                                                                                                                                                                                             |

- Tick this box to confirm that a figure exemplifying the gating strategy is provided in the Supplementary Information.
